# Supplementary material
Source: PubMed Central journal article supplement (PMC5514698)
Supplement: pnas.1612980114.sd01.pdf [file pnas.1612980114.sd01.pdf]

# Alignment of DNA-PKcs (protein sequence)

```

mosquitoes -----MESDLSTCLRQLKTCLDTPQIP-----QARSIIDRI
Zebrafish -----MAADTSIVGGIQGYLLKLHSSLEDTVSTNVAIVCHDIIGDL
Xenopus  MLPASAGGSSGDGGGEEDEVVVSAKSAGGLLGSLLHQLHGLLSLSPGMGN--EARTLLRNL
Chicken  -----MAGGVQECLQELH-----GCLQPGDAMRGYGLLRGL
Mouse    -----MAEEGTGVRWLLQLQEFLSAADRCSAAGASYQLIRSL
Rat      -----MADPGAGLRCWLLQLQEFVSAADRYNAAGASYQLIRGL
Cattle   -----MADSGSGVRGSLQLQESLSAADRCSAAVASGQLLRGL
Wolf     MFS-----SSQIPRVFLIPSRRELRLVLQLQESLSAGDRCSAAMASYQLTRGL
Human    -----MAGSGAGVRCSSLRLQETLSAADRCGAALAGHQLIRGL
Chimpanzee -----MAGSGAGVRCSSLRLQETLSAADRCGAALAGHQLIRGL
                                     : .*:                               :

```

```

mosquitoes TQLIVEKAEESSQAETDFNLECM LTSANGLVAFLNKSFSSAKHFGKVIESTFELFRKTI EK
Zebrafish  GQECMIT-KNE-NELVLQTSLLFAKEEGLLSFLRRSLSTEKILRETRVEIMNFLGAF LQR
Xenopus    AEECLVS-AGGSSALDFNISLIFSKEIGLLAFVVRKLSSEE-FKDCREDALKFLSTFLEK
Chicken    GEACLTC-LAG-GALALHVS L VFAPERGLLAFVCRSLGVVEE-FRECREEALKFLCVFLEK
Mouse      GQECVLS-TSS-AVQALQISLVFSRDFGLLVFVRKLSLIED-FRDCREEALKFLCVFLEK
Rat        GQECVLS-TCS-AVQALQISLVFSKEFGLLVFVRKLSLIDE-FRDCREEALKFLCVFLEK
Cattle     GQECVLS-SGP-ALLALHTSLVFSKDFGLLVFVRKLSLIDE-FRDCREEALKFLCVFLEK
Wolf       GQECVLS-SDP-AVLALQTSLVFSKDFGLLVFVRKLSLIDE-FRDCREEVLKFLYIFLEK
Human      GQECVLS-SSP-AVLALQTSLVFSRDFGLLVFVRKLSLNSIE-FRECREEILKFLCIFLEK
Chimpanzee GQECVLS-SSP-AVLALQTSLVFSRDFGLLVFVRKLSLNSIE-FRECREEILKFLCIFLEK
:      :                :. . ::: **: *: **: . : . . :::: :::

```

```

mosquitoes HSPLM-GKRMVIVPI----ALRYIQSSSVPARSRELA-----ALVLQDSVAYGC
Zebrafish  MSATVRGW EKNYAVELKDT CIVVYTKDKSAKCRNPALDLLIKILYLT KDSSITQNLRI GD
Xenopus    IGSNV----QPYAMDIKTL CVTVYTKDRAAKCKIPALELLIKLFLQLLKN SYKIEEFKIGE
Chicken    IGERA----HPYACSLKQTCISVYTKERA AKCKIPALELLIKLLQSLRRSCLMEEMKVGE
Mouse      IDQKV----MHYSLDIKNTCTSVYTKDR TAKCKIPALDLLIKLLQILRSTRLMDEFKIGE
Rat        IDQKV----LHYSFDIKNTCTSVYTKDR TAKCKIPALDLLIKLLKILRSSRVMDEFKIGE
Cattle     IGQKI----IPYSLDIKNICTSVYTKDKAAKCRIPALELLIKLLQTLRSSRLMDEL RVGE
Wolf       IGQKI----TPYSLDIKNTCTSVYTKDKAAKCKIPALDLLIKLLQTLRSSRLMDEF SIGE
Human      MGQKI----APYSVEIKNTCTSVYTKDRAAKCKIPALDLLIKLLQTLFRSSRLMDEFKIGE
Chimpanzee MGQKI----APYSVEIKNTCTSVYTKDRAAKCKIPALDLLIKLLQTLFRSSRLMDEFKIGE
:          * :. . .: *          :.. *

```

```

mosquitoes LQNETYAQLDQLPAELLLL V FQOGKLPNRFQONLYELLGQLAQNFPASIP-EPDRVRDIYL
Zebrafish  MFNKFY GEL-----CQKHKIPD TVLGC IYELLGVLGEVHPSEM VNNSDKLYKAYL
Xenopus    IFNKFY GEL-----ATKSKLSD TVLEK VYELLGILGEVQPCEMTDNSEKLFKAF L
Chicken    IFNKFY GEL-----AVRSKISD TVLEKIYELLGVLGEVHPADMINNSEKLFRA YL
Mouse      LFNKFY GEL-----ASKSKLPD TVLEK VYELLGVLGEVHPSEMINHSENLFRA FL
Rat        LFNKFY GEL-----VSKSKLPD TVLEK VYELLGVLGEVHPSEM VNHSENLFRA FL
Cattle     LFTKFY GEL-----ALKAKIPD TVLEKIYELLGVLGEVHPSEMINNSDKLFRA FL
Wolf       LFNKFY GEL-----ALKTKIQD TVLEKIYELLGVLAEVHPSEMINNSEKLFRA FL
Human      LFSKFY GEL-----ALKKKIPD TVLEK VYELLGLLGEVHPSEMINNAENLFRA FL
Chimpanzee LFSKFY GEL-----ALKKKIPD TVLEK VYELLGLLGEVHPSEMINNAENLFRA FL
: .: *.:*          : *: : . :***** *: : *..: . ::: :*

```

```

mosquitoes NAAEKQLL-EENYPSLVSLAGAVRGLD LFLVHFAPSENDREL RQ-RLYLLVKKLSIWEEN
Zebrafish  GELKGQMTSTTKEPKLPV VAGCLKGIAALMVNFTKSVEEDPAASKEIFDYALKAI SPQTD
Xenopus    GELKAQMISSTRNPKFPV IAGCLKGLSALMINFTKTMEEDPKTSKEIFDYTVKAI SPQVE
Chicken    GELKTQMTSATRVPKLP I VAGCLRGLTALMYNFTKSVEEDAQTSKEIFDFAVKAI RPQVD
Mouse      GELKTQMTSTVREP KFPVLAGCLKGLSSL CNFTKSMEEDPQTSKEIFGFTFKAI RPQIE
Rat        GELKTQMTSTVREP KFPVLAGCLKGLSSL CNFTKSMEEDPQTSKEIFGF TLKAI RPQIE
Cattle     GELKTQMTSTVREP KLA VLAGCLKGLASLM CNFTKSMEEDPQTSREIFDFALKAI RPQID
Wolf       GELKIQMTSAIREPKLPV LAGCLKGLSSL CNFTKSMEEDPQTSREIFDFALKAI RPQID
Human      GELKTQMTSAVREP KLPVLAGCLKGLSSL CNFTKSMEEDPQTSREIFNFV LKAI RPQID
Chimpanzee GELKTQMTSAVREP KLPVLAGCLKGLSSL CNFTKSMEEDPQTSREIFNFV LKAI RPQID
: *: . *.: :**.:*: : : . *: : : : . : : . * : :

```



mosquitoes H-----DSSLPALYRALMNTLFVIVEKLDLSTRKRTFQDDGQE-----Q  
Zebrafish DTGFVDGAPAAKNYNLRDLNRHLYDALVQSVMKIVEKLDLSVQKVSAADEVQSDA--SAG  
Xenopus DSIFSEDEFSTLNSPLQSLNRLLYDELVKSSILKVIKLDLTLQKQDSGQENDGGI-NSSL  
Chicken ESIFEEENFLTGN SPLQSLNRLLYDELIKSSILKIIKLDLTVQKLVHEQDE-NETDSAF  
Mouse DFILGDETFLFVNSSLKSLNHLLYDEFIRSVLKIVEKLDLTLKQTVGEQEDGST-ADVV  
Rat DFILGDETFLFVNSSLKSLNHLLYDEFIRSVLKIVEKLDLTLKQTTGEQEDERT-ADVV  
Cattle DSSLADEAFVFNSSLQSLNRLLYDEFVKSVLKIVEKLDLTLKQSVGEQEDENKAAGIW  
Wolf DSSLADEAFVFNSSLQSLNRLLYDEFVKSVLKIIKLDLTLKRNVEHEDENEATGVW  
Human DSILADEAFFSVNSSLSESLNHLLYDEFVKSVLKIVEKLDLTLLEIQTVGEQENGDEAPGVW  
Chimpanzee DSILADEAFFSVNSSLSESLNHLLYDEFVKSVLKIVEKLDLTLLEIQTVGEQENGDEAPGVW

. \* \*\* ::::: ::\*\*\*\*\*: . :.

mosquitoes ELFFSDPNIDLLPTKPKDYHIFLNVLVELYRDMLHGPQTPAAVRELFADWIRPYFERFVRQ  
Zebrafish IVLSSDPTANLMPNPKPKDFIAFINLVDFCELLP-----SRNPEYFAQWMHPLCHELILQ  
Xenopus IIATSDPAANLYPNKPKDFTAFVNLVFCSEILP-----KEHIEYFESWVYAFGYELVLQ  
Chicken IGPTSDPASNLPKPKPTDFIAFINLVFCRDILP-----DKHVEYFQPWVYSFGYELIIH  
Mouse VIPTSDPAANLHPAKPSDFSALINLVFCREILP-----RKHVGFPEPWVYSFAYELILQ  
Rat VIPTSDPAANLHPKPNDFSAFINLVFCREILP-----KKQVSFFPEPWVYSFAYELILQ  
Cattle VIPTSDPAANLHPAKPKDFSFAFINLVFCREILP-----EKHVEFFGPWVHSFSYQLILQ  
Wolf VIPTSDPAANLHPAKPKDFSFAFINLVFCRDILP-----EKHIEFFPEPWVYSFAYELILQ  
Human MIP TSDPAANLHPAKPKDFSFAFINLVFCREILP-----EKQAEFFPEPWVYSFSYELILQ  
Chimpanzee MIP TSDPAANLHPAKPKDFSFAFINLVFCREILP-----EKQAEFFPEPWVYSFSYELILQ

\*\*\* : \* \* \*\*.\*: ::\*\*\*\*\*: ::\* \* \* : : : :

mosquitoes SLNRPLVSGFVKLIEMGLATAERIGYFRQQEAPSE-----DFRTTQMLLAFYLEQTI  
Zebrafish SIRFPLVSGFYKLLSLSMGIAKKTQYFQDVKQCP-KQVGGSTMENACFSLAKFGKEVCV  
Xenopus STRLPLVSGFYKLLSVVMKNVKKIRYFEGFNSKTYKKAPEDPERLSCFALFAKFGKEVSS  
Chicken STRLPLISGFYKLLSVTMKIAKKIKYFEGVGPKSLRKATEDPEKSSCFALFAKFGKEVTA  
Mouse STRLPLISGFYKLLSIAVKNARKIKYFEGISPKSLKHSPEDETEKYSFCALFAKFGKEVSV  
Rat STRLPLISGFYKLLSIAVKNARKIKYFEGVSPKCLKHSPENTEKHSCFALFAKFGKEVSV  
Cattle STRLPLISGFYKLLSLAVRNARKIKYFEGVGPKSQKPSPEDEPEKHSCFALFAKFGKEVSV  
Wolf STRLPLISGFYKLLSVAVRNARKIKYFEGVMKSQTQAPKDPEKYSFCALFAKFGKEVTV  
Human STRLPLISGFYKLLSITVRNARKIKYFEGVSPKSLKHSPEDEPEKYSFCALFVKFGKEVAV  
Chimpanzee STRLPLISGFYKLLSITVRNARKIKYFEGVSPQSLKHSPEDEPEKYSFCALFVKFGKEVAV

\* . \*\*:\* \*\* \*\*::: : ..: \*\*. : : \* \*

mosquitoes QRALYAIGELQLACLRFVLNAPVRLLDVDFIEDKTRKQPLMVDVFRTAFLRGRSLLSIARA  
Zebrafish -RMKQYKDELLAACLMFILSLHGMVALDI-----KAYIPALQAALRLGLSHAPLATA  
Xenopus -KIRQFKDELLASCLTFVLSLPHDIIIMDI-----KAYIPALQIAFKLGLSCPPLADV  
Chicken -KMKQYKDELLASCLNLLSLPHDIVMLDI-----KAYIPALQNAFKLGLSCTPMADL  
Mouse -KMKQYKDELLASCLTFVLSLPHDIIELDV-----RAYVPALQMAFKLGLSHMPLAEI  
Rat -KMKQYKDELLASCLTFVLSLPPDIIKLDV-----RAYVPALQMAFKLGLSHLPLAEI  
Cattle -KMKQYKDELLASCLTFVLSLPHDIIALDV-----RAYVPALQMAFKLGLSYAPLAEA  
Wolf -KMKQYKDELLASCLTFILSLPHDIIELDI-----RAYIPALQMAFKLGLSYTPLAEV  
Human -KMKQYKDELLASCLTFLLSLPHNIIELDV-----RAYVPALQMAFKLGLSYTPLAEV  
Chimpanzee -KMKQYKDELLASCLTFLLSLPHNIIELDV-----RAYVPALQMAFKLGLSYTPLAEV

: \*\* : \*\* \*\*.\* : : : : : : : : : \* : \*

mosquitoes ALYSLQRIVRFRYPPLRREIRERLLRQVLPLEPFLRTRDSTQPPAQSLRLAKFKRHRTA  
Zebrafish ALDALESWSSF----IPAAIILQPHYTDILPHLDGYLKTSSSEKDDSNMEVTFVSTGSSK  
Xenopus GLDALQDWSTY----IPSDILQPYKDIIPLLDGYLTTTDISDESLSDLDAVRISRALQK  
Chicken GLDALEDWSAH----IPRHIMQPYKDVLPPLDGYLKNSTTVPEPQNNWEVRKLSRAAQK  
Mouse GLHALKEWSVH----IDKSIQPYKDIIPCLDGYLNTSTLSDET KSHWGLSALSRAAQK  
Rat GLHALKEWSVH----IDKSIQPYKDIIPCLDGYLNTSTLSDET KSHWEVSALSRAARK  
Cattle GLNALEEWSVY----ICKHVIQPYKDIIPSLDGYLKTSALESDETRSNWEVSALSRAVQK  
Wolf GLNALEEWSVC----ICKHIIQPHYKDIIPSLDGYLKTSALESDETKNSWEVSAPSQAQK  
Human GLNALEEWSIY----IDRHVMQPYKDIIPCLDGYLKTSALESDETKNNWEVSALSRAAQK  
Chimpanzee GLNALEEWSIY----IDRHVMQPYKDIIPCLDGYLKTSALESDETKNNWEVSALSRAAQK

. \* : \* : : : : : : : : \* \* : \* . : . .



mosquitoes IGLIVTEQEQIGLSSEANGGSHGAIVEQYLLALDHLGKLFQQRKALFNGCSSDESARSGR  
Zebrafish ESLALAHFDEKSV-----GTVQQCCSSLDHLKRIIKHKADSLNINSKRRIIPRG--  
Xenopus ESLALSHADEKSL-----GTTQQCCSDAVDHLKRIIRKAASLNKAMKRRVPRG--  
Chicken ESLALHTHDEKSL-----GTTQQCCDAINHLKRIIKHKAPALNKEGKRRVPRG--  
Mouse ESLALAHDEKSL-----GTVQQCCDAIDHLRRIIEKKHVSLNKAKKRRLPQG--  
Rat ESLALAHADEKSL-----GTIQCCDAIDHLRRIIEKKYISLNKAKKRRLPRG--  
Cattle ESLALAHTEQSL-----GTVQQCCDAVDHLGRIIEKKHVSLNKAKKRRCPRG--  
Wolf ESLALAHTEKPL-----GTIRQCCDAIDHLRRIIEKKHVSLNKVKKRRRPRG--  
Human ESLALAHADEKSL-----GTIQCCDAIDHLCRIIEKKHVSLNKAKKRRLPRG--  
Chimpanzee ESLALAHADEKSL-----GTIQCCDAIDHLCRIIEKKHVSLNKAKKRRLPRG--  
. \* ::. :: : . . \* :::\*\* ::: :: : \* . . ::.

mosquitoes RQLIPTELGGGEMEHLVWRWLFQCAARQRLYRRKCMELFARLSKTVRDVATAEQFLAKQF  
Zebrafish --F-P-ADQSVCLSNVVLWLLTQCGRPQTECRHKSMELFFEFVPLLPGNSSPAMWLDEQL  
Xenopus --F-P-QGSTVCLFDIVLWLLVQCGRPQTECRHKAMQLFFEFVPLLPGNKTPSAWLDQV  
Chicken --F-P-ATKSVCLQDVVMWLLVQCGRPQTECRHKAMELFYEFVPLLPGNILH--LLGADV  
Mouse --F-P-PLTSLCLLDLVEWLLAHCGRPQTECRHKSMELFYKVFVPLLPGNKSPSLWLKDLI  
Rat --F-P-PLTSLCLLDLVKWLFAHCGRPQTECRHKSIELFYKVFVPLLPGNKSPSLWRDLI  
Cattle --F-P-PMASLCLSDVVQWLFNTNCGRPQTECRHKSIELFYKLVPLLPGNRSPSSWLRDLV  
Wolf --F-P-PSASLCLLDLVQWLLAHCGRPQTECRHKSIELFYKVFVPLLPGNKSPSLWLKDIL  
Human --F-P-PSASLCLLDLVKWLWLLAHCGRPQTECRHKSIELFYKVFVPLLPGNRSPNLWLKDV  
Chimpanzee --F-P-PSASLCLLDLVKWLWLLAHCGRPQTECRHKSIELFYKVFVPLLPGNRSPNLWLKDV  
: \* : .:\* \*\*: .\* . \* \*:\*.::\*\* .: : . .

mosquitoes THEQIVSIC--L-----QADSLQGIERASTLESIRNEQTNPPIMNISLWLEYFLATVDMY  
Zebrafish KQRGPGFLISCLEGGG-----LLSQPT---LREIEAPFSIRGTLQWMDLLLAALDCY  
Xenopus KKEGIIFLINRFEGAGHSDGKHMGIILNIP---LHDLHEPFSMHAFLQWLDMLLAALDCY  
Chicken KKRVDVFLINKFEGGSDAKSPSGILSQPT---LRDMQEPFSLTVMRWMDFLAALDCY  
Mouse KKKGISFLINTFEGGASSSDQAPILAQPT---LVYLOGPISLRGVLQWLDLLLAALECY  
Rat KAEGISFLINTFEGGASSSQSGILAQPT---LLHLQGPVSLRGMQLWLDHLLAALCY  
Cattle QKEGVPFLVSTFEGGG--ARDQAPAGLLAQPT---LRHLQGPFSLRAALQWMDALLAALCY  
Wolf KNKDTSFLINTFEGGSGDRPSGILVQPT---LFHLQGPFSLRAALQWMDMLLAALCY  
Human KEEGVSVFLINTFEGGG--CGQPSGILAQPT---LLYLRGPFSLQATLCWLDLLLAALCY  
Chimpanzee KEEGVSVFLINTFEGGG--CGQPSGILAQPT---LLDLRGPFSLQATLCWLDLLLAALCY  
. : : : \* \* . : \*:::\*\*::\* :

mosquitoes CWLRRREGLVV--DELL--QTLLSRILPAFRYFLRSVVFNTVQEIIMSNIIEPVES--FQQRSYEQ  
Zebrafish NTFNTLRCLQLQRILGTCEKSSFLPAVHFFLTELSDM-----IQAARACFRLGNAGQ  
Xenopus NTFIEMRFLKANIILGNADKSSFLKAVHFFIVYLSMED-----IKAAEKFFTVGSKSS  
Chicken NTFFELRMIKPHEILGVNERSFFLEAVDFFLETIALHD-----IHAAEQCFDCRSRGN  
Mouse NTFIEKETVQGQEVVLAQVSSLLKSAFFLESIAHDS-----ARAVEQRFQVGGAPGP  
Rat NTFIEEKTQVQEVVLAQVSSLLKSAFFLESIAHDS-----ARTVEQRFQVGGTGP  
Cattle NTFLDAGTLSAAEVVLAQVSSLLKSAFFLESIAHDS-----IAAAQCFQVGGTGD  
Wolf NTFIEEKTLPKAPDVLGTETQSSLLKSAFFLESIAHDS-----ITAAEKCFGTGAAGH  
Human NTFIGERTVQALQVLAQVSSLLKSAFFLESIAHDS-----IIAAEKCFGTGAAGN  
Chimpanzee NTFIGERTVQALQVLAQVSSLLKSAFFLESIAHDS-----IIAAEKCFGTGAAGN  
: : :\* \* : .: .\*: : . . \*

mosquitoes -RMSADKVFVRFDALKSAVVVQVVDMLVLLLRHSEDTVCSAVVLELWQDQATIEFLLALL  
Zebrafish SHFSPRETEQYNYSKCSIIIVRMLEFSTMVVQKCPQDL--WKLMEKDVFN--SLFTLVVLA  
Xenopus -IFSPHEIEEYNYSKCTIIIVRIIEFTIMFIEICQQDS--WKILENSVFNE--TMWELIAVTV  
Chicken -IFSPQEREVYNYSKCTIIIVRIMEFVIMILEICQQDF--WKLLEKELLNA--NFIELLVMTV  
Mouse --PSLHEEEKYNYSKCTVLRVIMEFTTLLIASP--ED--CKLLEKDLCNT--NLMQVVLKMI  
Rat --PSVQHEEKYNYSKCTVLRVIMEFTTLLVTFP--ED--CKLLEKDLCNT--KLMKVLVLM  
Cattle -RPSQEGDRYSYSKCTVVVRVLEFSTLLGTC--DG--WKLKGDSCSA--DLMRLLVRTL  
Wolf -RPSQEGERYNYSKCTIVVRIMEFTTLLNTSP--DG--WKLLEEDLCNNKFMFTLLVKIL  
Human -RTSPQEGERYNYSKCTVVVRIMEFTTLLNTSP--EG--WKLKDLCNT--HLMRVLVQTL  
Chimpanzee -RTSPQEGERYNYSKCTVVVRIMEFTTLLNTSP--EG--WKLKDLCNT--HLMRVLVQTL  
\* : .: .\*:\*:\*:\*:\*: . : : . . . : :

mosquitoes LKPHRLGQYCNFSIHHEVEGDRHLWAQLETLVLQLIERS-SEPIGQRFTIALTEQLILVM  
Zebrafish CEPSSIGFN-----MADLEVMTHLPEVCFPLKALASAPYRTQLESCIRMRI--K  
Xenopus CDPSSIGFN-----TADVEVINNLNPNICIKLLKSLGKTTYRSALEASLKKRVT--Y  
Chicken CDPSSIGFN-----TADVQVMKNLPDISVRLKALMKSPYKEYLQLCKKRIT--P  
Mouse CEPMSLGFN-----IGDVQVMNHLPSICVNLLKALRKSPYRDMLETHLKEKVT--V  
Rat CEPLSIGFN-----IGDVQVMNHLPSICVNLLKALRKSPYRDKLETHLKEKVT--A  
Cattle CAPSSVGFN-----VGDVVRMEQLPDVCVALLRALKTSPHQDMLEARLREEVT--A  
Wolf CQPSSIGFN-----IGDVLVMNHLPDVCVNLMKALKKSPYKDTLEMCLKEKIT--V  
Human CEPASIGFN-----IGDVQVMAHLPDVCVNLMKALKMSPYKDILETHLREKIT--A  
Chimpanzee CEPASVGFN-----IGDVQVMAHLPDVCVNLMKALKMSPYKDILDTHLREKIT--A  
\* : \* . \* : . \* : . \* : : : :

mosquitoes EDVSEMRMTLLIQRTHAEDQKLAKGLRFIAKHLRNRTLLAGT---AKDRRIPLAACRLL  
Zebrafish QSVEELCAIDL YETDTRNSHASMNL-LLSACRQLHQSGLLNSVLHSQDASYGCSLGSKLL  
Xenopus QSIEELCSVDLYDPEARFDRVKLCS-MLSACKQLYKAQFLNSIVTEQVGG--IRFGSKLL  
Chicken QSFEDLCSVDLFNSDARFDQVRFSA-VLSACKQLQKSGLLHSVLHSQDERPHPSIGSKLL  
Mouse QSVEELCSINLCSSGARQERSKLLS-ILSACKQLHKAGFSHVISPSQSTALNHSVGMRL  
Rat QSVEELCAINLCSSAACQERTKLLS-LLSACKQLHKAGFSHIIISASQSTALNHSIGMRL  
Cattle ESIGELCAVDLYGPDAMKRARLAS-LVLACKQLHKAGFLHVIMPSQSADEQHSIGMKLL  
Wolf QSIEELCAVDLYGPDAYVDRATLAS-VVSACKQLHRAGVLHVVLPSQSADQRHSVGIKLL  
Human QSIEELCAVNLYGPDQVDRSRLAA-VVSACKQLHRAGLLHNILPSQSTDLHHSVGT  
Chimpanzee QSIEELCAVNLYGPDQVDRSRLAA-VVSACKQLHRAGLLHSILPSQSTDLHHSVGT  
: . . : \* . : : : . : \* . . . . \*\*

mosquitoes QDCYEAIGQ--ESVC-LVLSPSATRFGTIVLEAIFGLADSTGHGDDMDGLVEFVIS----  
Zebrafish TSVYKSIAPGTDKRSKSLPSMDVGSRKLADRLVQLSFC LGDQS-----EQTVGLLLNTITL  
Xenopus SVVYKGIAPTSEKRSKSLPSLDISSKRLAEGLELAFMFGRC-----EELVSLLLNTVIL  
Chicken SVVYKSIAPGSEKRSKSLPAVDISSKRLADRLQLAFADDQC-----EELVSLLLNTVVL  
Mouse SLVYKGIAPAERQCLQSLDPSCKSLANGLLELAFGFGGLC-----DHLVSLLLNSAML  
Rat SLVYNGIAPAQEKQYLQSLDPSCKSLASGLLELAFAFGGLC-----EHLVSLLLNSSML  
Cattle SLVYKSIAPGHEGLSLSLDPSCRRFALELLELAFACGGLC-----ERLVGLLLDTAVV  
Wolf FLVYKSIAPGDEREYFPSLDPSCKRLASGLLELAFAFGGLC-----EHLVDLLD TAVL  
Human SLVYKGIAPGDERQCLPSLDLCKQLASGLLELAFAFGGLC-----ERLVSLLLNPAVL  
Chimpanzee SLVYKGIAPGDERQCLPSLDLCKQLASGLLELAFAFGGLC-----ERLVSLLLNPAVL  
\* : . \* : : . . : . : : \* : \* : : .

mosquitoes -CSLS--EDMLQPNIRHGEHFLVCFGGAVYELFLQNPNSNCLPMLLKALKPENFSFIVRFL  
Zebrafish SVPLSGSLNPHFLFSFHGGEYFYSLFQTSINTELLRSVDRSVPLLLSS-ANQNPMSVSVLL  
Xenopus SVPLSGLSQSNAINFSHGGEYFYSLFQTSINTELLNLD TAVVELLKS-SVEDPKMVSCVL  
Chicken SVPLSKASERNFVDFSHGGEYFYSLFSDTINQQLKNLDVIVIHLMES-SVSNPQMVGSIL  
Mouse STQYLGSSQRN-ISFSHGGEYFYSLFSEVINSELLKNLDIAVSRLMES-SSDNPKMVSTVL  
Rat STQYLGSSQRN-ISFSHGGEYFYSLFPEVINTELLKSLDVTVSRLLES-SSDNPKMVSTIL  
Cattle STPSSGGTQRNVVFSHGGEYFYSLFSETVNTPELLRNLDAVSELMKS-SMGNPKMVSTVL  
Wolf SMPASGESQRNMVFSHGGEYFYSLFSEIINTELLRNLDMTVLKLKMS-SVDNPKMVSAIL  
Human STASLGSSQGSVIHFSHGGEYFYSLFSETINTELLKNLDLAVLELMQS-SVDNPKMVSAIL  
Chimpanzee STASLGSSQGSVIHFSHGGEYFYSLFSETINTELLKNLDLAVLELMQS-SVDNPKMVSAIL  
: : \* : \* \* : : \* . . : \* : : : : . \*

mosquitoes CNLMDYSYRKQAANTDSLKCLVEMLLAGGWSPLFECSRLQSNQFGACDVQLIELMSSVAM  
Zebrafish NGMLDHSFRERSVRKSQGSQLAEQVL-KGWDLLRPWWDGPA-ATPESKTSVLSLLAKVLQ  
Xenopus NGMLDQSFQRRTIRKQQGAKLVNAV L-QNWKRLDSWWCKD--SSPESKMAVLTLLAKVLQ  
Chicken NGMLDQSFRETRIRKQQGAKLVNAV L-QNWKRLDSWWCKD--SSPESKMAVLTLLAKVLQ  
Mouse NGMLDTSFRDRAVQKHQGLKLATAIL-QNWRKCDSSWWAPD--SAPESKTTVLSLLAKMLQ  
Rat NGMLDMSFRDRAVQKHQGLKLATAIL-QNWRKCDSSWWAPD--SAPESKTTVLSLLAKMLQ  
Cattle NGLLDQSYRDRASQKHQGLKLVSTIL-QSWGCCSTWWAGD--ATPDSKTAVLTLLAKILQ  
Wolf NGMLDQSFDRASRQKHQGLKLATAIL-QHWKKCDSSWWAKD--SAPESKTAVLTLLAKILQ  
Human NGMLDQSFREANRQKHQGLKLATAIL-QHWKKCDSSWWAKD--SLETKMAVLTLLAKILQ  
Chimpanzee NGMLDQSFREANRQKHQGLKLATAIL-QHWKKCDSSWWAKD--SLETKMAVLTLLAKILQ  
: : \* \* : \* : : . . . \* . : \* \* : : : :

mosquitoes I-CPFPLNEIHHRVGPYGRWLTELIGSTRSELSIELKAKAIVLLPPLLGPNGAPEAESH  
Zebrafish IDSSVCSNTSHPAFNAVFTTFT-AL--LTDVSMPLNLKSQALIMLPFFTALPSMP-----  
Xenopus IDSSVCFDINHLAFAEVFRTYT-SI--LTDQTLGLNLKSQAI ILLPFFT KL TGGK-----  
Chicken IDSSVSFNTSHEAFTAVFDTYT-SL--LTDQNLGLNLKGHAVI ILLPFTNL SGEK-----  
Mouse IDSALSFDTNHSSFSEIFTTYA-SL--LADTKLGLHLKQGAI ILLPFTSL REGS-----  
Rat IDSTLSFDTNHSSFSEIFTTYA-NL--LADTKLGLHLKQAVILLPFFT RV TEDR-----  
Cattle IDSSVSFNTSHSAFPEVFTTFV-SL--LGDPKLDLHLKQAVALLPFFTSSL TGD R-----  
Wolf IDSSVSFNTNHSAPPEVFTTYT-SL--LADSNLGLHLMQAVILLPFFT NL TGGN-----  
Human IDSSVSFNTSHGSFPEVFTTYI-SL--LADTKLDLHLKQAVTLLPFFTSL TGG S-----  
Chimpanzee IDSSVSFNTSHGSFPEVFTTYI-SL--LADTKLDLHLKQAVTLLPFFTSL TGG S-----  
\* . . : \* . : : : : : : . \* . : : : \* :

mosquitoes WAEVENALEALQTKHFPLRSAEFPNPERIGYLNCLERLLDAMVISRSPLLLKAI IQMT  
Zebrafish LEE LRRALES LVATHFPMQSD EFP RGS LQCNNY MDCIRKFLEALQLSQS P L L L K L M A R V L  
Xenopus LTELKNTLDL F V A S N F P M K C D E F P R G T L K F N N Y V D C I K K F L D A E L S Q S P M L L Q L M T E I L  
Chicken LHD L K N A L D Q L V A F N F P M S S D E F P K G T L K H N N Y V D C T K K F L D A E L S Q S P M L L Q L M T E V L  
Mouse L E N L K H I L E K L I V C N F P M K S D E F P P D S L K Y N N Y V D C M K K F L D A E L S Q S P M L F Q L M T D I L  
Rat L G D L K H I L E K F I V L N F P M K S D E F P P D S L K Y N N Y V D C M K K F L D A E L S Q S P M L L Q L M T D I L  
Cattle L Q E L R H I L E K L I V S H F P M R S G E F P P G T L R Y S N Y V D C M K K F L D A E L S Q S P M L M E L M T E V L  
Wolf L E D L E H V L E K L I V S N F P M K S E E F P V G T L R Y S N Y V D C M K K F L D A E L S Q S P V L L Q L M A E I L  
Human L E E L R R V L E Q L I V A H F P M Q S R E F P P G T P R F N N Y V D C M K K F L D A E L S Q S P M L L E L M T E V L  
Chimpanzee L E E L K R V L E Q L I V A H F P M Q S R E F P P G T P R F N N Y V D C M K K F L D A E L S Q S P M L L E L M T E V L  
: : . \* : : . . \* \* : . \* : \* . : : \* \* : : : :

mosquitoes APDGDGHIAETELRTAIERFFADQPHEVQCKRLELWELFANHA-YAPVRETILRRYLC  
Zebrafish CRDK-KHIMEELFQACFQKIAHQSYLKGQVLLSSTYQSFQAKEVPSNFMLMGLIDRVLL  
Xenopus CRDE-RHFMEELFQSSFKVIERSSCDAQVILLNTLHNMFTSESVMLNGTLQSLTNRCLL  
Chicken CRDH-RHSMEDLFQASFKRISRRSSTDKQVLLDVTVKMFQNE D L L S N I V R Q A F V D R S L L  
Mouse CREQ-RHIMEELFQTFKRIARSPCVTQLNLLSVYTMFRKADLPSNVTRQAFVDRSLL  
Rat CREQ-QHIMEELFQTFKRIARRSPCVTQLNLLSVYTMFRKGGLSDVT-QAFVDRSLL  
Cattle CREQ-QHVLEELFQSTFRKIARKSSCATQLGLLESVYRKFSRDDLLPSATRQAVVGRALL  
Wolf CREQ-QHVMEELFQSTFKKIARKSSCVTQLALLESVYRMFRKDDLLSNVTRQAFVDRSLL  
Human CREQ-QHVMEELFQSSFRIARRGSCVTQVGLLESVYEMFRKDDPRLSFTRQSFVDRSLL  
Chimpanzee CREQ-QHVMEELFQSSFRIARRGSCVTQVGLLESVYEMFRKDDPRLSFTRQSFVDRSLL  
. : \* \* : : : . \* \* \*

mosquitoes TALWHCRYDSIVQFYTRIIRALSHNTMVEINGRTGWALEHALIDRAASYRLVEHYAALLP  
Zebrafish PLASHCSPQALSQFFISNIADIMTTLQTRFTKSVESVFESQIMMKIGCKLLEVLYSRLP  
Xenopus TLLWNCSGDALLVFFTNIIICLAMDTLKS RFTKVSEAAFENQITKKWGYKMLEVLYSRLS  
Chicken TLM SHCSLDALREFFCKIIVQAMDTLNSRFTKSN ECVFDTQITKKMGYYKML E V M Y I R L S  
Mouse TLLWHCDLDTLKEFFSRIVVDAIDVLKSRFTKLN EFTFDTQITKKMCYYKMLAVMYSRLL  
Rat TLLWHCDLDTLKEFFSRIVVEAIDVLKSRFTKLN EFAFDTQITKKMGYYKML E V M Y S R L P  
Cattle TLLRHCGLGALRDFFSRTVVEAIDVLKSRFTKLN EFAFDTQITKKMGYYKML E V M Y S R L P  
Wolf TLLWHCGLNALREFFGKIVVETIDVLKSRFTKLN EFTFDTQITKKMGYYKML D V M Y S R L S  
Human TLLWHCSLDALREFFSTIVVDAIDVLKSRFTKLN EFTFDTQITKKMGYYKML D V M Y S R L P  
Chimpanzee TLLWHCSLDALREFFSTIVVDAIDVLKSRFTKLN EFTFDTQITKKMGYYKML D V M Y S R L P  
. \* : : \* : : . . : : : : \* :

mosquitoes KQILTGDNC PVAQELYGSAHDTLGAPVRGQRLIGDFS KRAHGVRVALPTNDRTLAELFR  
Zebrafish KEEVYSKNSAINQAFCGTGCA-----EGNELSKNLLKSCFEAFT-ENMTGEMVLELRR  
Xenopus KDDICS---KVNAYHVSSNP-----EGNELTKALIKLCYDTFT-ENMCGETQLEKRR  
Chicken KDDVHSKDSKINQAYRGSVSV-----EGNELTKALIKLCYDAFT-ENMAGENQLEKRR  
Mouse KDDVHSKEAKINQAFHGSRVA-----EGNELTKTLKLCYDAFT-ENMAGESQLEKRR  
Rat KDDVHSKESKINQAFQGSVA-----EGNELTKTLKLCYDAFT-ENMAGESQLEKRR  
Cattle KDDVHSKESKINQVFHGSSVT-----EGNELTKTLIKLCYDAFT-ENMAGEAQLLERRR  
Wolf KDDVHSKESKINQVFHGSCIT-----EGNELTKTLIKLCYDAFT-ENMAGENQLLERRR  
Human KDDVHAKESKINQVFHGSCIT-----EGNELTKTLIKLCYDAFT-ENMAGENQLLERRR  
Chimpanzee KDDVHAKESKINQVFHGSCIT-----EGNELTKTLIKLCYDAFT-ENMAGENQLLERRR  
\* : : . : : : . \* . \* : \* . . . : \* \* \*

mosquitoes KYQCAAYRALVALISNTNEDARMYSVLLFRFRESREKGEFLWRHLIDCSNEELYLECTQEQE  
Zebrafish QFHCAYNCAIALISCSFNETKFKYQGFLFTEKPKDNQFIFDNLIDSQRVYNFPPIEID---  
Xenopus QYHCAAYNCAISLISCVFSELKFKYQGFLFTEKKEKNLLIFENLIDLQRSYTFPIEVE---  
Chicken QYHCAAYNCAIAVISCVFTESKFKYQGFLFTEKSEKNLLIFENLIDLKRQYVFPVEIE---  
Mouse LYHCAAYNCAISLISCVFNELKFKYQGFLFNEKPEKNLIFIFENLIDLKRCYTFPIEVE---  
Rat LYHCAAYNCAISLISRNVFNELKFKYQGFLFSEKPEKNLIFIFENLIDLKRCYTFPIEVE---  
Cattle LYHCAAYTCAIALVRCVFTELRFYQGFLFSEKPEKNLLIFENLIDLKRCYTFPIEVE---  
Wolf LYHCAAYNCAISVICCVFTELKFKYQGFLFSEKPEKNLLILENLIDLKRCYTFPIEVE---  
Human LYHCAAYNCAISVICCVFNELKFKYQGFLFSEKPEKNLLIFENLIDLKRRYNFPVEVE---  
Chimpanzee LYHCAAYNCAISVICCVFNELKFKYQGFLFSEKPEKNLLIFENLIDLKRRYNFPVEVE---  
: : \* \* \* \* . : : : : : : \* . : \* \* . : \* : : . \* \* \* . . : :

mosquitoes QLSRTFEKRVAIRREGGGGGDPAQRKPALKDPGLSVVMESSLSQQVFRFDMSHSVVLSAR  
Zebrafish VPIERKKKYVMIRKEVSGENGGDSAPVY-LSSQSYMADSSLSEEMSQDFSTGVQFSY  
Xenopus VPMERKKKYFAIRKEARDASSADSEPRY-LSSQSYMADSSLSEEMSQDFSTGVQFSY  
Chicken VPLERKKKYIAIRKEAREAWNDGQDEPKY-LASASYMDDSSLSEEMSQDFSTGVQFSY  
Mouse VPMERKKKYIEIRKEARDAANGASGSPHY-MSSLSYLTSSSLSEEMSQDFSTGVQFSY  
Rat VPMERKKKYVEIRKEARDAANGASGNPRY-MSSLSYLTSSSLSEEMSQDFSTGVQFSY  
Cattle VPMERKKKYIEIRREAREANEDSGGPQY-MSSLSYLADSSLSEEMSQDFSTGVQFSY  
Wolf VPMERKKKYIEIRKEAREAVNGDSDGPHY-LSSLSYLADSSLSEEMSQDFSTGVQFSY  
Human VPMERKKKYIEIRKEAREANGDSDGPSY-MSSLSYLADSTLSEEMSQDFSTGVQFSY  
Chimpanzee VPMERKKKYIEIRKEAREANGDSDGPSY-MSSLSYLADSTLSEEMSQDFSTGVQFSY  
. : : . \* \* \* \* . \* . \* : : \* \* \* \* : : \* \* \* \* . \* :

mosquitoes EVAQKDA-----ELAKRQOGLTNSVSLERTKINRHEIMATVCGCIRHMAATKVP---  
Zebrafish NSQNPSGVSSSSRMRRER-KEVLSQDETVLEMEDELNQHECMANMTALLRHMQRNITPKV  
Xenopus SSQDKMLSQSASRKKELITEGKTFDDVMEFEMDELNQHECMAAMTGLIKHMNSSEITPKV  
Chicken SSQDVTASSAHFRKRET-SEYMLVNDMELEMEDELNQHECMAPLTTLIKHMQRNQITPKV  
Mouse SSQDRKPTTGHFQRREH-QDSMTQDDIMELEMEDELNQHECMAPMIALIKHMQRNVIAPKG  
Rat SSQDRKPTTGHFQRREH-QDSMAQDDIIELEMEDELNQHECMAPMTSLIKHMQRNVIAPKG  
Cattle GSQDPQSSAGHFRRRER-QDPDGPGLVDLVDLELSQHECMAPLVALVQHMRLEAALPG  
Wolf GSQDPKSTHGHFRRREH-KDPMVQDAVLELEMEDELNQHECMATMTALIKHMQRNQLIL-SK  
Human SSQDPRPATGRFRRREQ-RDPTVHDDVLELEMEDELNRHECMAPLTALVKHMRSLGPPQG  
Chimpanzee SSQDPRPATGRFRRREQ-RDPTVHDDVLELEMEDELNRHECMAPLTALVKHMRSLGPPQG  
: \* : : : : \* \* \* \* : : \* \* :

mosquitoes -----LDSVVHFLVGLADAGQKNVRLFLAKVIDNCRNELQPHAALLIGPLMQLVIV  
Zebrafish EEGVRPSDLPPWMKFLQKLDNPSTPLNIRLFIAKLIINTEEIFRPHYAKHWLGPLMQLVV  
Xenopus EEGASPQDLPPWMKFLHGKLGNTSTPLNIRLFIAKLIVNTEEVFCPYAKFWIGPMLQLIV  
Chicken EEGVIPVDLPLWMKFLHSGKLGNSVPLNIRLFIAKLIVNTEEDVFRPHYAKQWLGPMQLVIV  
Mouse EEGSIPKDLPPWMKFLHDKLGNASVSLNIRLFLAKLVINTEEVFRPHYAKHWLSPLLQLAV  
Rat QEGSISKDLPPWMKFLHDKLENASVSLNIRLFLAKLVINTEEVFRPHYAKHWLGPLLQLAV  
Cattle EEGSVPRNLPPWMKFLHDKLGNPSVSLNIRLFLAKLVINTEEVFRPHARHWLGPLLQLVIV  
Wolf DEGSVPRNLPPWMKFLHDKLGNPSVSLNIRLFLAKLVINTEEVFRPHYAKYWLSPLLQLVIV  
Human EEDSVPRDLPSWMKFLHGKLGNIIVPLNIRLFLAKLVINTEEVFRPHYAKHWLSPLLQLAA  
Chimpanzee EEDSVSRDLPSWMKFLHGKLGNIIVPLNIRLFLAKLVINTEEVFRPHYAKHWLSPLLQLAA  
\* : : \* \* . \* : : \* \* \* \* \* \* : : \* \* : : \* \* \* \* .

mosquitoes DGYI-FRGLNPLVTDLIALVLEWNASGEARRSLREGATGEIASLASVLLRFIMKHACFPQO  
Zebrafish SSSNGGEGIHFMVVDIVTVLSWASVASPKGNTR-----DEVLVNRLGLFLKNCFHHS-  
Xenopus SGNNGGSGIHYMVIETLVTILSWSSIATPKGLAK-----EEILANRLLLEFLMKNVFHE-  
Chicken SGDNGGEGIHYMVVEIAVTVLSWTSVTTPKGNIK-----DEILANRLLLEFLMKNVAFHQ-  
Mouse CENN-REGIHYMMVEIVATILSWTGLATPTGVPK-----DEVLANRLLRFLMKHVFHP-  
Rat CENI-GEGIHYMIVEIVATILSWTGLATPTGVPK-----YEVLANRLLYFLMKYVFHP-  
Cattle SENNGGDGIHYLVVEIVATVLSWTGIATPVGVPK-----DEVLANRLLHFLMKHVFHQ-  
Wolf SENNGGEGIHYMVVEIVTVLSWTGLATPVGVPK-----DEVLANRLLHFLMEHVFHQ-  
Human SENNGGEGIHYMVVEIVATILSWTGLATPTGVPK-----DEVLANRLLNFLMKHVFHP-  
Chimpanzee SENNGGEGIHYMVVEIVATILSWTGLATPTGVPK-----DEVLANRLLNFLMKHVFHP-  
\* . : : : . : \* \* . : : \* \* \* \* \* \* : : \* \* \* \* \* \* :

mosquitoes SARKMAVLRRLNLELIQEVIVQWHEALTPVAELLFEMVSHRQPTEDRSQQLIAGLQLGTI  
Zebrafish ---KRAVFRHNLEIIRTVVECWKDCLTIPYDLIYERFAGTDPNSKDNS----VGIQLLGI  
Xenopus ---KRAVYRHNLEIIKTVLECWKECLSIPLYMLIYEGFSGTDPNTKDNS----VGIQLLGL  
Chicken ---KRAVFRHNLEIIKTVIECWKNCLSIPLYLIFEKFSGGDPDTKDNS----VGIQLLGI  
Mouse ---KRAVFRHNLEIIKTVLECWKECLSIPLYRILIFEKFSHKDPNSKDNS----VGIQLLGI  
Rat ---KRAVFRHNLEIIKTVLECWKECLSIPLYRILIFEKFSNKDPNSKDNS----VGIQLLGI  
Cattle ---KRAVFRHNLEIIKTVLECWKDCLSVPYRILIFEKFSKDPNSKDNS----VGIQLLGI  
Wolf ---KRAVFRHNLEIIKTVLECWKDCLSVPYRILIFEKFSKDPNSKDNS----VGIQLLGI  
Human ---KRAVFRHNLEIIKTVLECWKDCLSIPLYRILIFEKFSGKDPNSKDNS----VGIQLLGI  
Chimpanzee ---KRAVFRHNLEIIKTVLECWKDCLSIPLYRILIFEKFSGKDPNSKDNS----VGIQLLGI  
\* \* \* \* \* : : : \* : : \* : :

mosquitoes VLLKGRGKLPWMESTKQDYLRVLRCLDLPDS-TSFKSAALLLGHSLAHIYPDGFPEPE  
Zebrafish VMANNLPPYDAACGIEHDFYQSLANNLSFIRYKEVYSAAEVIGLILNYMTERE-----  
Xenopus VLANNFSPFDQKCGIDAERYFQCLANNLALTRFKEVYIAAAEVIGLVLHYIYHNE-----  
Chicken VLANNLPPFDLKCIEDRVRYFQALVSNMGLLRYKEVYAAAAEVLGLALQYIAERQ-----  
Mouse VIANNLPPYDPNCDITSAMYFEALVNNMSFVKYKEVYAAAAEVLGLILQYITERK-----  
Rat VVANNLPPYDLKGDITSAMYFEALVNNMSFVKYKEVYAAAAEVLGLILQHVTERK-----  
Cattle VMANNLPPYDPKCGVESVRYFEALVSNMSFVRYKEVYAAAEVIGLVLRYSGRE-----  
Wolf VMANNLPPYDPKCGIERIKYFEALVSNMSFVKYKEVYAAAAEVLGLTLRYITERE-----  
Human VMANDLPPYDPQCGIQSSEYFQALVNNMSFVRYKEVYAAAAEVLGLILRYVMERK-----  
Chimpanzee VMANDLPPYDPQCGIQSSEYFQALVNNMSFVRYKEVYAAAAEVLGLILRYVMERK-----  
\* : : \* : : : : \* : : \* : : \*

mosquitoes QQTGELET-FHTECIAKLTSIQ-REYDRKFAEVLYETAKGFPSIADPFLSVLSYRFPSPAS  
Zebrafish ---NQIEGTLFNITVTKLMDLRKKEVDDKFIVCLSKVSKHFPPLVDRFINPVFYLLPKLH  
Xenopus ---KRTDAPIFDYVVKELKRHQTSNKEDKFIMCLNKVVKNFPPFADRFMTVVLYLLPKLH  
Chicken ---NILEDPVYDCVIKQLKRHQNT-QQDKFIIICLNKVVKNFPPPLADRFMNAVFFLLPKLH  
Mouse ---HVIAELVCELVIKQLKQHONT-MEDKFIVCLNKIAKGFPPPLADRFNLALFFLLPKFH  
Rat ---HVIAESVYELVVKQLKQHONT-MEDKFIVCLNKIVKGFPPPLADRFNLALFFLLPKFH  
Cattle ---KMLEESVHELTVVKQLKRHQNT-LEDKFIVCLSRATKNFPPPLADRFMNSVLFLLPRFH  
Wolf ---NILENVVYELVIKQLKQHONT-MEDKFIVCLNKVVKNFPPPLADRFMNAVFFLLPKFH  
Human ---NILEESLCELVAKQLKQHONT-MEDKFIVCLNKVTKSFPPPLADRFMNAVFFLLPKFH  
Chimpanzee ---NILEESLCELVAKQLKQHONT-MEDKFIVCLNKVTKSFPPPLADRFMNAVFFLLPKFH  
\* : \* : \* : \* : \* : \* : \* : \*

mosquitoes GGEKRLYLELLLGGRLKFNDELYRELASMEITLLL--QDGELQLPTLHLLNRSLSLVRE  
Zebrafish GMLKTHCLECVLSRADV--IPEIFLHLKTKGLSQIMSHKDEGRQVCLDIIHKILACLKP  
Xenopus GVLKTQCLELIMHRAED--IPDLFIELKNKEFCQIMNSRDDRQKVCLDIIYKILSKLKP  
Chicken GVMKNYCLEVIMCRAEE--IPDLYLQKSKDFIQIMKHRDDRQVCLDIIYKMLSTLKP  
Mouse GVMKTLCEVVL CRAEE--ITGLYLQKSKDFLQVMRHRDDRQKVCLDIIYKMAVAKLKP  
Rat GVMKTLCEVVL CRAEA--ITGLYLQKSKDFLQVMRHRDDRQKVCLDIIYKMAVAKLKP  
Cattle GVMKTLCEVVL CRAEE--TPDLYLQKSKDFVQVMRHRDDRQKVCLDIIYKMMARLRP  
Wolf GVMKTLCEVVL CRAEE--ITNIYELKSKDFIQVMRHRDDRQKVCLDIIYKMAVAKLKP  
Human GVLKTLCEVVL CRVEG--MTELYFQKSKDFVQVMRHRDDRQKVCLDIIYKMPKLKP  
Chimpanzee GVLKTLCEVVL CRVEG--MTELYFQKSKDFVQVMRHRDDRQKVCLDIIYKMPKLKP  
\* \* \* \* \* : : \* : : \* : \* : \* : \* : \*

mosquitoes LEHLQQLVEPIGRVATEPSTPNEARAVAFEILIYIHEHRSAEELSECRTS-----VWRN  
Zebrafish E-ELKEILGAVTAFASHPS--VCRERMYDILMWIQDNYSDESREDSSTSVVSVARET  
Xenopus A-ELHEFMSSIAAFNSHSP--VCRERMYEIFMWIYDNYRDQESQSDSKSVVFSMAKEG  
Chicken P-ELKELLPGVTGFISHPSV--ICRQRMYYDILMWIYDNYSDPESQADGDSQEVLSLAKEI  
Mouse I-ELRELLNPVVEFVSHPS--TCREQMYNILMWIHDNYRDQESQNDSDSQEIFKLAKDV  
Rat T-ELRELLNPVVEFVSHPS--TCREQMYNILMWIHDNYRDQESQMDSDSQEIFKLAKDV  
Cattle A-ELRELLSAVVEFLAHPAV--LCRERMYAILMWVHDNYRDQESQADEDSREVFKLAKDV  
Wolf V-ELRDLNLSVVEFISHPS--VCREQMYNILMWIHDNYRDQESQADDSREVFKLAKDV  
Human V-ELRELLNPVVEFVSHPS--TCREQMYNILMWIHDNYRDPESETDNDSDQEIFKLAKDV  
Chimpanzee V-ELRELLNPVVEFVSHPS--TCREQMYNILMWIHDNYRDPESETDNDSDQEIFKLAKDV  
\* : : : : \* : : \* : \* : \* : \*

mosquitoes LIRGLCGSHETELGSGSIRGRILEYLTYSGLKLPDVKERFLFVLAQLYDPTVEGEFLGNA  
Zebrafish LLQGLTDEN-----YGLQLYVRNFWSHESRLPPETLERMLVVLKSLYSSRIEEQFLSLA  
Xenopus LLQGLVDDN-----SELQLIVRNFWSDETRLPSNTTERMLAILSSLYSTKIEKHYLSLA  
Chicken LLQGLIDEN-----AELQLIVRNFWSDETRLPANILDRMLMLNSLYSAKIEYQYLSLI  
Mouse LIQGLIDEN-----VGLQLIIRNFWSHETRLPSNTLDRLL-ALNSLYSPKIEVHFLSLA  
Rat LIQGLIDEN-----LGLQLIIRNFWSHETRLPSNTLDRLL-ALNSLYSPKIEVHFLSLA  
Cattle LIQGLTDEN-----PGLQLTIRNFWSHETRLPSNTLDRLL-ALNSLYSPKIEVHFLSLA  
Wolf LIQGLIDEN-----AGLQLIIRNFWSHETRLPSNTLDRLL-ALNSLYSPKIEVHFLSLA  
Human LIQGLIDEN-----PGLQLIIRNFWSHETRLPSNTLDRLL-ALNSLYSPKIEVHFLSLA  
Chimpanzee LIQGLIDEN-----PGLQLIIRNFWSHETRLPSNTLDRLL-ALNSLYSPKIEVHFLSLA  
\*::\*\* .. : : : : . : \*\* : : \*\* \* . \*\* . : \* . : . \*

mosquitoes VALLLDPAIRCRESKDRFLHEYLNADVKFCYTIETAARQRHTMTLLTPMFAETSQQRQ  
Zebrafish TDLLLEMTSHSPDFTRNMFEP--LSECKFQDYTIDSNWRMR--STVLTMPFMETQATQG  
Xenopus TNLLLEMTSKSPDYLRKMFEP--LSECKFQDYTIDSSWRLR--STVLTMPFVETQLSQS  
Chicken TNFLEMTSKSPDYSRKIFEP--LSECKFHDFVIDSSWRFR--STMLTPMFVETQASQS  
Mouse TNFLEMTRMSPDYLNPIFEP--LSECFQDYTIDPDWRFR--STVLTMPFIETQASPS  
Rat TNFLEMTRMSPDYLNPIFEP--LSECFQDYTIDPDWRFR--STVLTMPFIETQAFPS  
Cattle TDFLEMTSLSPDFRSLFEP--LSECFQDYTIDPDWRFR--STVLTMPFVETQASQS  
Wolf TDFLEMTSLSPDYANPVFEP--LSECFQDYTIDSDWRFR--STVLTMPFIETQASQS  
Human TNFLEMTSMSPDYPNPMFEP--LSECFQDYTIDSDWRFR--STVLTMPFVETQASQG  
Chimpanzee TNFLEMTSMSPDYPNPMFEP--LSECFQDYTIDSDWRFR--STVLTMPFVETQASQG  
. : \*\* : . : : \* . : : \* : . : \* \* \* : \* \* \* \* \* \* . \*

mosquitoes LQSFITGRGSQMEQLIRATQGLGSDAAQKQLPFEPDQDPGRLSKGNETFAMPT---QQH  
Zebrafish AEAA----GSQ-----AATVRGQIRATQTSLEFSQTLAPGRRSAYNWL TGSSVDTLADY  
Xenopus MORS----RM-QGTMEADEPEGGQIRATQQHFQFTPTQNI GGRSSFNWL TGSSMDTLADY  
Chicken TNRN----SSQERSLSISGSVGGVRATQRYEFTPTQNVSGRSSFNWLTGNSIDTLAEY  
Mouse ILHT----QTQEGPLSDQRQKPGQVRATQQQYDFTPTQASVERSSF DWLTGSS IDLLADH  
Rat TLNT----QTQEGSPDRRQKPGQVRATQQQYDFTPTQTSVERSSF DWLTGSS IDLMADH  
Cattle TLQA----RTQEGSISARRAMAGQVRATQQQLDFTPTQASAGRVLSHWLTAGSTDPLGGS  
Wolf TLQT----RTQERSLPAQVMARQIRATQQQYDFTPTQADGRSSFNWL TGSS IDPLVDY  
Human TLQT----RTQEGSL SARWPVAGQIRATQQQHDFTLTQTADGRSSF DWLTGSS TDPLVDH  
Chimpanzee TLQT----RTQEGSL SARWPVAGQIRATQQQHDFTLTQTADGRSSF DWLTGSS TDPLVDH  
\* : \* \* \* . .

mosquitoes TLL-----FESSALQLNRRSQRT-----GSS---TDTA-----AQ  
Zebrafish SLSS--DSLSSLLVFDKRSERPQ--AAWRAVGAGFGSKRLTATSDDTDSRTAGQSLKIDM  
Xenopus SVESP--ESLPSALLFVNKRNEKVRGPKPLGPNFGTQKLGPHVTE SKTK-S----IE  
Chicken TVPSSSESLSSSMLLVNKRSEKFKQA AFKPVGPDFGKKRLSLPGDKVDSKTK-G----ID  
Mouse TVFSS--ETLSSSLLF SHKRTEKSQRMSCKSVGPDFGTGKKGLPDDEVDNQVKS G----TP  
Rat TVFSS--ESLSSSLLF SHKKEKSQRVSWKSVGPDFGTGKKGLPDDEVDNQVKS G----TH  
Cattle LAPTA--EASSALLFAHKRPERPRGTPPKPVGPEFGKKRLG LLEDEVDGAQ-G----KN  
Wolf TVSSS--DSSSSSLLFAQKRNEKSQRAPLKS VGPDFGKKGLPDDEVDNKAK-G----ID  
Human TSP-----SSD SLLFAHKRERLQRAPLKS VGPDFGKKGLPDDEVDNKVK-G----AA  
Chimpanzee TSP-----SSD SLLFAHKRERLQRAPLKS VGPDFGKKGLPDDEVDNKVK-G----AA  
: . : : : . : .

mosquitoes QDRGFERLRKRILKDSATNRQQQTAWAVSRHYASQRQRTEQRRDSTSKVTLRYRRLADY  
Zebrafish RRADILRLRRRFLKDEKESIKFAKKEIHSQRTERERRADLKIRQDAQVTLRYRVRGDL  
Xenopus ERSEILRLRRRFLKDREKLSLIYARKGTAEQKREKAIKIEQKLGDAQITLRYRNRHGEL  
Chicken ERAEILRLRRRFLKDQEKVSLIYARKGVAEQKREKEMKSELKMKFDGQVTLRYRVRGDL  
Mouse SQADILRLRRRFLKDREKLSLIYARKGLMEQKLEKDIKSEFKMKQDAQVVLRYRNRHGDL  
Rat SQTEILRLRRRFLKDQEKLSLIYARKGLMEQKLEKDIKSELKMKQDAQVVLRYRNRHGDL  
Cattle NRAEILRLRRRFLKDQEKLSLIYARKGVVEQKREKEIKSELKMKHEAQVVLRYRNRGDL  
Wolf NRTEILRLRRRFIKDQEKLSLIYARKGIAEQKREKEIKSELKMKHDAQVILRYRNRQGD  
Human GRTDLLRLRRRFMRDQEKLSLMYARKGVAEQKREKEIKSELKMKQDAQVVLRYRNRHGDL  
Chimpanzee GRTDLLRLRRRFMRDQEKLSLMYARKGVAEQKREKEIKSELKMKQDAQVVLRYRNRHGDL  
: \* : \* : \* : \* . : : : : . : : \* \* \* \* . \*

mosquitoes PDLQINLLAFLPLQALCRRDITTCARQTFVAIFNGLVECLLVGDSEGRGTGRMVGDWDRF  
 Zebrafish PDIQIQFSSLIAPLQALAQRDATLAKQLFSSLFAGVLVEMERLKSNETAD-----I  
 Xenopus PDIQIAYSNIAPLQALAQRDPTMAKLLFSSLSFGILSETAS-----NAS-----L  
 Chicken PDIQIEHCSLIAPLQGLAQKDPFQKQLFSSLSFGGIFCEVKKSKIPSEKKA-----I  
 Mouse PDIQIQHSSLITPLQAVAQKDPPIIAKQLFSSLSFGILKEMNKFKTTSEKNI-----I  
 Rat PDIQIQHSSLITPLQAVAQKDPPIIAKQLFSSLSFGILKEMHKFRTTSEKNI-----I  
 Cattle PDIQIPHSSLITPLQAVAQRDPLVARQLFSGSLCSGILRESGERRTVAEGRG-----A  
 Wolf PDIQIKYSSLVTPLQAVAQRDPVVAKQLFSGLSFGI IKEMDKYKTMSEKNN-----I  
 Human PDIQIKHSSLITPLQAVAQRDPIIAKQLFSSLSFGILKEMDKFKTLSEKNN-----I  
 Chimpanzee PDIQIKHSSLITPLQAVAQRDPIIAKQLFSSLSFGILKEMDKFKTLSEKNN-----I  
 \*\*:\* \* : : \*\*\*.:.: \* \* : \* : : \* .

mosquitoes VGRLDDEALNPILESTKACDPNLFGLLIELTLGKASGKFTLPPRTIASVAGTCNMLPMGAL  
 Zebrafish LKELVQTLNAFLNKSTVYFPPFISCIQDMSYH-HKALLGVEPSLVSATCLASLQQPMGIL  
 Xenopus IGKLLQFNSFLSNLSYFPPFIACVQDMCYQ-HDELLHLNPNANVSTSCLASLQQPLGIL  
 Chicken IQKLLKDFNHFLSTSVSYFPPFIACIQEISYK-HRELLLEDSANVSTSCLASLQQPVGIL  
 Mouse TQNLLQDFNRFLNNTTFLFPPFVSCIQEISCQ-HPDFLTLDPASVRVGCLASLQQPGGIR  
 Rat IQNLLQDFNRFLNNTTFLFPPFVSCIQEISCQ-HVDLLTLDPAAVRVGCLASLQQPGGIR  
 Cattle AQKLLQDFTHFLDTSFSFPPFVSCIQEISCQ-HADLLSLDPALVSGAGLAGLQQPGAIC  
 Wolf TQKLLQDFSHFLNSTFSFPPFVSCIQEISCQ-HTDLLSLDPGSIRASCLASLQQPVGVR  
 Human TQKLLQDFNRFLNNTTFSFPPFVSCIQD ISCQ-HAALLSLDPAAVSAGCLASLQQPVGIR  
 Chimpanzee TQKLLQDFNRFLNNTTFSFPPFVSCIQD ISCQ-HAALLSLDPAAVSAGCLASLQQPVGIR  
 . \* : : . \* . : : \* : . . : : : : : \* .

mosquitoes YLEAKLADGADFDEPV-R-----TAGSVSSEADHWLQLSTLYHALHEHSVMVGIFGEEK  
 Zebrafish LLEESLLHGAGASEEPLKRAR---GKRELPPDTERWIHLAKLYRSLGDYDVVRGIFSGK  
 Xenopus LLEKGLLHIE-IPDEPPAKMRKEKAKSEIPDLDVRWIELAKLYRSIGDYDVLRGIFSGK  
 Chicken LLEHALMALS-PAEPPSKMR---GRTELPPDVVKWLELAKLYRSLGDYDVLRGIFSGK  
 Mouse LLEEALLRLM-PK-EPPTKRVR---GKTCLPPDVLRWMELAKLYRSIGDYDVLRGIFSSE  
 Rat LLEEALLHLL-PK-EPPTKRIR---GKTCLPPDVLRWMELAKLYRSIGDYDVLHGIFSSE  
 Cattle LLEEALLRLA-PQ-EPPAKRAR---GRPSLPPDVGRWMELAKLYRSIGDYDILRGIFSSE  
 Wolf LLEEALLHLG-PQ-EPPAKQFK---GRMRVSPDVVRWMELAKLYRSIGDYDILRGIFSSE  
 Human LLEEALLRLL-PA-ELPAKRVR---GKARLPPDVLRWVELAKLYRSIGDYDVLRGIFTSE  
 Chimpanzee LLEEALLRLL-PA-EVPAKRVR---GKARLPPDVLRWVELAKLYRSIGDYDVLRGIFTSE  
 \*\* \* \* : : : : : \* : : : : \* :

mosquitoes LDSDPQLREAI EALGRYGAHRA YCELVMRVS---RARVDERNFCYKSAFNCLLQLG  
 Zebrafish IGTKSITFTALQAEAKSDYAEAVKLYNEALNKEDWDDGEP TITEKDFWEIAALEAYNHLT  
 Xenopus IEAKSITQRALNEEAKSDYAKAAKLYDEALTK-EFEDGDPTDAEKDFWELASLECYNHLT  
 Chicken IGTKDITQALLAEARS DYAEAAKCYDEALS KEDWEDGEPTEAEKDFWELASLECYDHLT  
 Mouse LGTTQDTQNAL LAEARS DYCAAKLYDEALNKLEWLDGEPTEAEKEFWELASLDCYNLS  
 Rat LGTKQDTQNAL LAEARS DYFQAANLYKEALNKLEWLDGEPTEAEKEFWELASLDCYNLS  
 Cattle IGTKQITQDALLAEARS DYSEAA RLYNEALNTQEWADGEPTEAEKDFWELASLDCYNQLA  
 Wolf IGTKQITQS AIFAEARS DYSEAAKQYNEALNKQWVDGEPTEAEKDFWELASLDCYNQLA  
 Human IGTKQITQS ALLAEARS DYSEAAKQYDEALNKQWVDGEPTEAEKDFWELASLDCYNHLA  
 Chimpanzee IGTKQITQS ALLAEARS DYSEAAKQYDEALNKQWVDGEPTEAEKDFWELASLDCYNHLA  
 : : \* : \*\* . \* : \* \* : . \* : \* : \* : \* : \* : \* : \* : \*

mosquitoes QWDVLLDE-----IGNQVTNHEELWCDEWNQENLLPHYVHGNALLVLAGDEGGREFYRLL  
 Zebrafish EWKSLEYCATVNI DSSPIRLDRMWTFTFYVETYLQYMMRSMKQLQMG-ETNQD LLSFV  
 Xenopus EWKPLEYCVSTVNI DTSPPDLNKMWSDFYQETYL PYMIRSKLKMLLSG-NNDQTLLTFV  
 Chicken EWKSLEYCATVNI DSGKPPDLNKTWSDPFYQETYL PYIIRSKLKLLNG-ENDQTLLTFI  
 Mouse KWKELEYCVSTVNI VSENSLDLSKMWSEPFYQETYL PYVIRSKLKLLQ-EGNQSLLTFV  
 Rat QWKELEYRSTVNI GSENSLDLSKMWSKPFYQETYL PYVIRSKLKLLQ-EDNQSLLTFV  
 Cattle EWTSLEYCVSTASADGEGTLDLSKMWSEPFYQETCLPYMVRSKLKLLLRG-EGDQALLTFV  
 Wolf EWKSLAYCVSIVSDNENPPDLNKMWSEPFYRETYL PYMIRSKLKLLQ-EGDQSLLTFI  
 Human EWKSLEYCVSTASIDSENPPDLNKIWSEPFYQETYL PYMIRSKLKLLQ-EGDQSLLTFI  
 Chimpanzee EWKSLEYCVSTASVSDSENPPDLNKIWSEPFYQETYL PYMIRSKLKLLQ-EGDQSLLTFI  
 : \* \* . . \* . : \* . \* : : . : \* : : : : \*



mosquitoes -----KDSSTLVELMQTAMNTSSKQLTEEPLSMGDRLRKFSMQCLQCGIDV  
Zebrafish AADRSPFALETLGEEKVQKILQLSQA-----SS--IAQVVEGLQIQALELLRSACK  
Xenopus AVCNEPDCLYEIDGGKAGVKVLDL-----ESPENVSGGLYRKS LHYFMNAVRK  
Chicken ALSQDPKCCEQIEEEKTGKILELSGE-----SSEPEKILAGLNKRAFQCFSSAARK  
Mouse ALSREPACLS DLEENKVN SILT LSGS-----NAENTETVITGLYQRAFHHLSKAVQS  
Rat ALSREPACLSGLEKSKTESIFALSGS-----NTENTERVISGLYQRAFHHLSMAVQS  
Cattle ALCDEPTCLAEIGESKARSVVELSGS-----SSEDADKVMAGLYQRAFHHLSAVRA  
Wolf ALRREPACLAEIEESRARRILDLSGS-----SLENAEKVIAVLYQRAFHHLSAVRT  
Human ALSSEPACLAEIEEDKARRILELSGS-----SSEDSEKVIAGLYQRAFQHLSEAVQA  
Chimpanzee ALSNEPACLAEIEEDKARRILELSGS-----SSEDSEKVIAGLYQRAFQHLSEAVQA  
: \* : \* : . .

mosquitoes LLDEGPSSSREGNSSANDSSMEQLADAHRLRLARYCYDELDPARTA-----AEELPV  
Zebrafish AEEE-----EQSFSQQHVNTHGIVEAYMTMANFCDRRLRESEQKEEA----ISSKLQSL  
Xenopus ATEE-----EQSHSIDKVDVRGIIKAYMTLVDFCDSHLRKVEEKSAV---MDHADYQHF  
Chicken SEEE-----VQSLSMEHVDVKVIDAYMTLVGFCDQHLRKEEEGSLE---INAADLQLF  
Mouse AEEE-----TQLSCWGHEAAAERAHAYMTLVGFCDQQLRKVEESA---SQKTSAE MEAY  
Rat AEEE-----TQLSCWGHEAAAERAHAYMTLVGFCDQQLRKVEESA---SQKTSAE MEAY  
Cattle AEEE-----AGPLARGQGPTAGVTVAYLTLAEFCQQLRQEEGMSV---LGS AELLTY  
Wolf AEEE-----AQPSLRGQGPVASTDAYMTLADFCQQLRKEEESASV---TESVELQTY  
Human AEEE-----AQPPSWSCGPAAGVIDAYMTLADFCQQLRKEEENASV---IDS AELQAY  
Chimpanzee AEEE-----AQPPSWSCGPAAGVIDAYMTLADFCQQLRKEEENASV---IDS AELQAY  
: \* \* : : . : \* . \* .

mosquitoes ERLLLTSLPAIKYGSREARHLFPVLLQLRNLQNDVLGKEFHENACSVPSWNFLPWIPQL  
Zebrafish PEHVVKMMLKALKLSSEEARLKFPRLQLVEVYPAETL DLMVREVVSVP C WLLIGWISQM  
Xenopus PEIMVEKMIKALKLNSSEARLKFPRLQIIEQYPS ETL DLMAREICTIPCWQF IGWISQM  
Chicken PAIVVEKMIKALKLNSREARLRFPRLLQI IERYPAETLGLVTR ELP SVPCWQF IGWISQM  
Mouse PALVVEKMLRALKLNSSEARLKFPRLQIIEQYSEETLNIMTKEISSIPCWQF IGWISHM  
Rat PALVVEKMLRALKLNSSEARLKFPRLQIIEQYPEETVNI I I KEISSIPCWQF IGWIGHM  
Cattle PALVVDKMLKALKFHSSEARLKFPRLQIVTQYPEETLGLMTREISSVPCWFEF IGWIGHM  
Wolf PGLVVDNMLKALKLHSSEARLKFPRLQIIELYPEETLSLMTKEISSTPCWQF IGWISHM  
Human PALVVEKMLKALKLNSSEARLKFPRLQI IERYPEETLSLMTKEISSVPCWQF ISWISHM  
Chimpanzee PALVVEKMLKALKLNSSEARLKFPRLQI IERYPEETLSLMTKEISSVPCWQF ISWISHM  
: : : \* : \* \* \* \* : \* : . . : \* . \* : : \* \* : :

mosquitoes LSYMQIATPDRPLAPSGVEHFLDEVLMRLVQDYPMALYFPARLLL GEL----LQPGASVR  
Zebrafish MALLDKPQA-----TAVQH----VIEEIAECYPQALIYPYMISS ENYTFEESASGQRNR  
Xenopus MAMLDKKE S-----IAVQH----IIEEIAENYPQALVYPFMVSGENYNFEDTVVGHKNK  
Chicken MALLDKDEA-----VAVQH----TVEEIVDTPYQAI IY PFTISSESYCFKDTAAGCRNK  
Mouse MALLDKEEA-----IAVQH----TVEE IADNYPQAI IY PFIISSESYSFKNTSSGHNNK  
Rat VALLDKEEA-----IAVQH----TVEE IADNYPQAI IY PFIISSESYSFQNTSSGHNNK  
Cattle LPLLDKEEA-----VAIQ R----TVEDIADHYPQAI IY PFMISSESYCFRDT SAGHKNK  
Wolf VALLDQEEA-----VAVQC----TVEE IADNYPQAI IY PFIISSESYSFKDTSTGHKNK  
Human VALLDKDQA-----VAVQH----SVEEITDNYPQAI IY PFIISSESYSFKDTSTGHKNK  
Chimpanzee VALLDKDQA-----VAVQH----SVEEITDNYPQAI IY PFIISSESYSFKDTSTGHKNK  
: : : . : : : \* \* \* : \* : . \* :

mosquitoes PFVNQFRAALSF-PVLDRFVAELYRVVMPETRLSNMIAELKRHLASVTD-QPTYQTFIER  
Zebrafish EFVVEKLESLLDKGGVIQGFVDALQQLSNPEMLFKDWDEVK NQLDKPNLDK KMKLQY--  
Xenopus EFVDRIKSKLDKDNVAQDFIHALEQLSNPPMIFQDWKEEVSNELSKASVNRNRVKELYKE  
Chicken EFVASIKNKLD RGGVVDQFIHALEQLSNPVM LFKDWADVRNELVKTRQNKI I LKEMYEG  
Mouse AFVERIKSKLDHGVEIHSF I NALDQLSNPDLLFKDWVSDTKDELGKNPVNKKNI EKLYER  
Rat AFVERIKSKLDQGGVIQGF I NALDQLSNPDMLFKDWVNDTKDELGKNPVNKKNI EKLYER  
Cattle EFVARIKAKLDREGVVQDF I NALDQLSNPEMLFKDWMEDVKVELGKTPVDKKNIQ RMYER  
Wolf EFVARIKTKLDLGGVIQDF I SALEQLSNPEMLFKDWTDDMKAE LAKNPVSKKNIEKMYER  
Human EFVARIKSKLDQGGVIQDF I NALDQLSNPELLFKDWSNDVRAELAKTPVNKKNI EKMYER  
Chimpanzee EFVARIKSKLDQGGVIQDF I NALDQLSNPELLFKDWSNDVRAELAKTPVNKKNI EKMYER  
\* \* : . \* . \* . \* : \* : \* : : . \* . : :

mosquitoes LV-----PDVFPLDTNDLWRYGQAYRAALPLVERVRTLQSLHPVEDRGTILAKLQEL  
Zebrafish MTELLGDAKSPRFGSYRRKFIQKFSKEVEKLLGAG--GSKLYERRKDKDFLQQ-----V  
Xenopus LCATLGNVKDPFMGAFRRRFSEKYTKEFDKAFGPD--GSKLLSMKS-DQFSKS-----A  
Chicken MYKNLGDVKAPGLGWLRRKFVQAFGKDFDSHFHGK--GSKLLDMKI-SDFNEI-----T  
Mouse MYAALGDLRAPGLGPFRRRFIQAFGKEFVKSFNG--GSKLLTMKV-DDFCKI-----T  
Rat MYAALGDFRAPGLGPFRRRFIQTFGKEFVKSFNG--GSKLLTMKL-DEFRNI-----T  
Cattle MHAALGDFQAPGLGSFRRRFIQAFGKEFVKHFGRG--GSKLPGMKL-QDFYTI-----A  
Wolf MYAALGDLRAPGLGAFRRRFIQVFGKEFVKHFGRG--GSKLPGMKL-RDFGSI-----T  
Human MYAALGDPKAPGLGAFRRRFIQTFGKEFVKHFGRG--GSKLLRMKL-SDFNDI-----T  
Chimpanzee MYAALGDPKAPGLGAFRRRFIQTFGKEFVKHFGRG--GSKLLRMKL-SDFNDI-----T

: \* . . : : : . \* : :

mosquitoes ETNLESLRPRSKTTRLQLEDLSPWLADYHSSGQRGSTTQLVEIPGOYGLDRGAPSPQHV  
Zebrafish DRMVQSMRG-FQKEPGNMKEYSPWLSSFKAETLK---NELEVPQYD-GSKPLPEYHA  
Xenopus EPLMVKMRSEQQKEPGLNKEYSPWMSGFKPEFLR---NELEIPGOYS-GRSKPMPEYHV  
Chicken TALLTKMNK-THKEPGLNKECSPWMSEFRAEFLR---NELEVPQYD-GKGKPLPEYHV  
Mouse GSLLVRMCK-DSKLPGNLKEYSPWMSGFKAQFLK---NELEIPGOYD-GSKPLPEYHV  
Rat DSLFVRMRK-DSKLPGNLKEYSPWMSGFT---VK---SELEIPGOYD-GSKPLPEYHV  
Cattle GSLLERMLR-ASNAPGNLRECSWMSNFRVEFLR---AELEVPQYD-GRSKPMPEHHA  
Wolf DSLFYKMCCT-DSKPPGNLKECSPWMSDFKVEFLR---NELEIPGOYD-GKGKPLPEYHA  
Human NMLLLKMNK-DSKPPGNLKECSPWMSDFKVEFLR---NELEIPGOYD-GRGKPLPEYHV  
Chimpanzee NMLLLKMNK-DSKPPGNLKECSPWMSDFKVEFLR---NELEIPGOYD-GRGKPLPEYHV

. : . : : : \* \* : : : : \* : \* \* \* \* .

mosquitoes TIVKVPDVVVYGTLRRLPIQLTFRGSDGNEYRFLAKFGEDLRQDQRIQQLQREITHRLRW  
Zebrafish KITGFDERVKVMTSIRRPKRIIRGDDERDY PFLVKGGEDLRQDQRIEQLFGVMNMILSQ  
Xenopus KISGFDERVKVMASIRKPKRIIVRGNDEREY PFLVKGGEDLRQDQRIEQLFEIMNIIISQ  
Chicken KISGFDERIMVLESIRKPKRITIRGSDQEH PFLVKGGEDLRQDQRIEQLFVDMNIVLSR  
Mouse RISGFDERVKVMLSIRKPKRIVIRGHDEKEY PFLVKGGEDLRQDQRIEQLFEVMNAILSQ  
Rat RISGFDERVKVMVSLRKPKRIVIRGHDEKEY PFLVKGGEDLRQDQRIEQLFEVMNAILSQ  
Cattle RIAGFDERVKVMASIRKPKRIVIRGHDEREY PFLVKGGEDLRQDHRIQQLQVMNSVLAH  
Wolf RIAGFDERIKVMASIRKPKRIIRGRDEKEY PLLVKGGEDLRQDQRIEQLFEVMNVLLSQ  
Human RIAGFDERVTVMASLRPKRIIRGHDEREH PFLVKGGEDLRQDQVEQLFQVMNGILAQ  
Chimpanzee RIAGFDERVTVMASLRPKRIIRGHDEREH PFLVKGGEDLRQDQVEQLFQVMNGILAQ

\* . : \* : \* \* : : . \* \* . : : \* . \* \* \* \* \* \* : : . \*

mosquitoes DQRCREQQQLRQTYDVVPIPNFGLFGWLEGTVMASEIAKQA-----APRYNPGRGOAH  
Zebrafish DTACSQRSLALRQTYQVIPITSRIGLIEWMENTCTLKDFLSSRRTEQEQTII---TRP--  
Xenopus DAACSQRHMQLKTYQVIPMTARIGLIEWMENTCTLKEFILNTMTEDEAKVYNS-KNGP--  
Chicken DAACSQRNMQLKTYQVIPMTTRGLIKWLENTCTLKEFLRNSMTEEDANYNS-LKGP--  
Mouse DAACSQRNMQLRQTYRVVPMSTRGLIEWIENTMTLKDLLLLSNMSQEEKVANNSDPKAP--  
Rat DAACSQRNMQLRQTYRVVPMSTRGLIEWIENTMTLKDLLLLSNMSQEEKVAYDSDSKAP--  
Cattle DAACQQRGLQMTTYHVPMSTRGLIEWIENTCTLKELLLSNMSREKKAYTSDPRAP--  
Wolf DTACSQRNMQLKTYHVIPMTSRGLIEWIENTLTKDFLLSNMSREKAAAYTSDPKAP--  
Human DSACSQRALQRTYSVVPMTSRGLIEWLENTVTLKDLLLNTMSQEEKAAAYLSDPRAP--  
Chimpanzee DSACSQRALQRTYSVVPMTSRGLIEWLENTVTLKDLLLNTMSQEEKAAAYLSDPKAP--

\* \* : : : \* \* \* : : . : \* \* \* \* : : : .

mosquitoes VHHEFGRFLMSVSKQLDPSANDSFNLSSYNAPALYGMAAAFCDRLQSKFVELAQITRG  
Zebrafish -NEFYDEWISKVAGKVEG-----IRRYAELYKKAKRVDTVNNFRRIEQMPVD  
Xenopus -LMHYNVWLDKREKIGD-----PRQHVTAAYTKCDRTSTVASFREREALVPK  
Chicken -RAAYSDWLSKMGGAQ--L--LSRYNAMYKNASRTETVIAFKSRESSVPE  
Mouse -IRDYKDWLWKVSGKSD-----AGAYVLMYSRANRTETVAFRRRESQVPP  
Rat -IYDYRDWLKIVSGRSD-----VKGYTLMYSRANRTETVTAFRRRENKQVPA  
Cattle -ASEYREWLTMVVGKCD-----PGAYARMFVANRTEAVTSFRKRESRVPA  
Wolf -PCEYRDWLAKMSGKYD-----VGAYMSMFKAASRTETVTSFRRRESRVPA  
Human -PCEYKDWLTKMSGKHD-----VGAYMLMYKGANRTETVTSFRKRESRVPA  
Chimpanzee -PCEYKDWLTKMSGKHD-----VGAYMLMYKGANRTETVTSFRKRESRVPA

: : : : : : . \* :

mosquitoes NTLKRALYDMAATPEAYYRLRMNFAKSLATMNVTCWVLGIGDRHLSNIVLERATGMLVGV  
Zebrafish DLLKRAFVRMSTTPEAFSLRSHFSSSHAVLCISHWILGIGDRHLSNFMINTETGGMIGI  
Xenopus DLLRRAFVKMSTTPEAFSLRSHFARSHALLCISHWILGIGDRHLSNFMINMETGGMIGI  
Chicken DLLRRAFVKMSTSPPEAFALRSHFVSSHALMCVSHWILGIGDRHLSNFMINKETGGMVGI  
Mouse DLLKRAFVKMSTSPPEAFALRSHFASSHALLCISHWLLGIGDRHLNFMVAMETGSGVIGI  
Rat DLLKRAFVKMSTSPPEAFALRSHFASSHALLCISHWLLGIGDRHLNFMVAMETGSGVIGI  
Cattle DLLKRAFVKMSTSPPEAFALRSHFASSHALLCISHWLLGIGDRHLNFMVAMETGSGVIGI  
Wolf DLLKRAFVKMSTSPPEAFALRSHFASSHALLCISHWLLGIGDRHLNFMVAMETGSGVIGI  
Human DLLKRAFVRMSTSPPEAFALRSHFASSHALLCISHWILGIGDRHLNFMVAMETGSGVIGI  
Chimpanzee DLLKRAFVRMSTSPPEAFALRSHFASSHALLCISHWILGIGDRHLNFMVAMETGSGVIGI  
: \*:\*:\*: \*:\*: \* \* : \*\* .\* \* \* : : \*:\*:\*:\*:\*:\*:\*:\*:\*: \*\* :\*:\*:

mosquitoes DFGIAFGAGTRDLPIPELVFPRLTPQFVGVMEPMRLAGVLQKCHLYTLQCLRNCRLLRA  
Zebrafish DFGHAFGSATQFLPVPELMPFRLTRQFINLMRPLAESGLIQSVMVHSLRAFRAEPDLLLN  
Xenopus DFGHAFGTATQFLPVPELMPFRLTRQFINLMLPMKESGIFDSVMVHSLRAYRSDPGLLIT  
Chicken DFGHAFGSATQFLPVPELMPFRLTRQFVNLMMMPVKEWGLIYSVMVHALRAYRADPGLLIS  
Mouse DFGHAFGSATQFLPVPELMPFRLTRQFVSLMLPMKETGLMCTVMVHALRAFRSCAGLLTD  
Rat DFGHAFGSATQFLPIPELMPFRLTRQFISLMLPMKETGLVCTVMVHALRAFRSCAGLLTD  
Cattle DFGHAFGSATQVLRVPELMPFRLTRQFINLMSPLKETGLVSSVMVCALRAFRSRADLLTT  
Wolf DFGHAFGSATQFLPVPELMPFRLTRQFINLMLPMKEAGVVYSIMVHALRAFRSHSDLLTN  
Human DFGHAFGSATQFLPVPELMPFRLTRQFINLMLPMKETGLMYSIMVHALRAFRSDPGLLTN  
Chimpanzee DFGHAFGSATQFLPVPELMPFRLTRQFINLMLPMKETGLMYSIMVHALRAFRSDPGLLTN  
\*\*\* \*:\*:\*:\*:\*:\*:\*:\*:\*:\*:\*:\*:\*:\*:\*:\*:\*:\*:\*:\*:\*:\*:\*:\*:\*:\*:\*:\*:\*:\*:\*:\*:\*:\*:\*:\*:

mosquitoes CLEVFRVREPTVDWLRARQRMVEQPGESGRAEERRSDREWNQVRVDTVLRKLNKANPKQ  
Zebrafish TMDVVFVKEPSLDWKNFELK-QLKK-GGTWTESVNTKEINWFPLQKVNFAARRKLEGTNPSV  
Xenopus TMDVFIKPEPSLDWKNLELK-QIKK-KGEWMDVDTTSLNWPYPAQKIHCARRKLAGANPCE  
Chicken TMDVVFVKEPSLDWKNFEQR-QLKK-GGTWIKENTAEVNWPYPLQKVSYVKKRLTGANPAR  
Mouse TMEIFVKEPSFDWKSFEQT-MLRK-GGSWIQEVNTEKNWYPQHKIRYAKRKLAPANPAV  
Rat TMEVFVKEPSFDWKGFEQT-MLRK-GGSWIQEVNTEKNWYPQHKIRYAKRKLAPANPAV  
Cattle TMDVVFVKEPSFDWKNFEQT-MLRK-GGSWIQEVNTEKNWYPQKIHAKRKLAPANPAV  
Wolf TMDVVFVKEPSFDWKNFEQK-MLKK-GGSWIQEVNTEKNWYPQKIHAKRKLAPANPAV  
Human TMDVVFVKEPSFDWKNFEQK-MLKK-GGSWIQEVNTEKNWYPQKIHAKRKLAPANPAV  
Chimpanzee TMDVVFVKEPSFDWKNFEQK-MLKK-GGSWIQEVNTEKNWYPQKIHAKRKLAPANPAV  
:::\*:\*:\*:\*:\*:\*:\*:\*:\*:\*:\*:\*:\*:\*:\*:\*:\*:\*:\*:\*:\*:\*:\*:\*:\*:\*:\*:\*:\*:\*:\*:\*:\*:\*:\*:

mosquitoes LLTDELRFVVAQQRDFLVGYLALVDAAPACTEKGRRATGTISTELQTEMLLEMAIDS  
Zebrafish ITSEELCLGFEMKMP--EYKGLLAVARGEE--QHNIRARLADKDLTVEDQVDCLLDQATDP  
Xenopus ITCEELRLGHEGSP--TYLAFLAVARGDK--AHNKRANDPKDGLSEEAQVQCLLDQATDP  
Chicken ITCDELRLGYEKLK--FYNDFAAVARGSA--DHNIRAKEPEDRLSEETQVRCLLDQATDP  
Mouse ITCDELRYLGHASS--AFRSYTAARGNR--DYNIRAQEPESGLSEETQVKCLVDQATDP  
Rat ITCDELRLGHEASP--AFRSYVAVARGNK--DYNIRAQEPESRLSEETQVKCLVDQATDP  
Cattle ITCNELLLGHEKES--AFRDYVAVARGSK--EHSVRAQEPESGLSEEAQVRCCLLDQATDP  
Wolf ITCDELFLGHEKAL--AFRDYVAVARGSK--DHNIRAQEPENGLSEEAQVKCLLDQATDP  
Human ITCDELLELLGHEKAP--AFRDYVAVARGSK--DHNIRAQEPESGLSEETQVKCLMDQATDP  
Chimpanzee ITCDELLELLGHEKAP--AFRDYVAVARGSK--DHNIRAREPESGLSEETQVKCLMDQATDP  
: \*:\*:\*:\*:\*:\*:\*:\*:\*:\*:\*:\*:\*:\*:\*:\*:\*:\*:\*:\*:\*:\*:\*:\*:\*:\*:\*:\*:\*:\*:\*:\*:\*:\*:\*:

mosquitoes RLLGITYSGWYPWF  
Zebrafish NILGRVWIGWEPWI  
Xenopus NILGRVWKGWEPWI  
Chicken NLLGRVWEGWEPWM  
Mouse NILGRTWEGWEPWM  
Rat NILGRTWEGWEPWM  
Cattle NILGRTWEGWEPWM  
Wolf NILGRTWIGWEPWM  
Human NILGRTWEGWEPWM  
Chimpanzee NILGRTWEGWEPWM  
.:\*\* .: \*\* \*\*:
